# Supplementary material
Source: publisher figshare collection journal article supplement (https://brill.figshare.com/articles/dataset/_/16825549)
Supplement: Supplementary file 1 [file 1]

## EDXRF SUPPLEMENTAL MATERIAL

- 1) Elemental Concentrations for all Archaeological Samples from Sakaro Sodo Site by unit and sample number, and the USGS RGM-1 Rhyolite Standard. All measurements in parts per million (ppm) (Shackley 2017: Table 1).

| Unit/Level Sample | Site        | Ti   | Mn   | Fe    | Zn  | Rb  | Sr  | Y   | Zr   | Nb  | Ba  | Source              |
|-------------------|-------------|------|------|-------|-----|-----|-----|-----|------|-----|-----|---------------------|
| 1-7-1             | Sakaro Sodo | 2656 | 1999 | 47190 | 418 | 142 | 11  | 117 | 1064 | 225 | 0   | Asille Group, Kenya |
| 1-7-2             | Sakaro Sodo | 3033 | 2342 | 54988 | 571 | 154 | 13  | 131 | 1080 | 225 | 0   | Asille Group, Kenya |
| 2-5-1             | Sakaro Sodo | 2955 | 2073 | 50193 | 437 | 175 | 12  | 118 | 1139 | 237 | 0   | Asille Group, Kenya |
| 3-3-1             | Sakaro Sodo | 2728 | 2021 | 46785 | 412 | 139 | 9   | 113 | 955  | 212 | 21  | Asille Group, Kenya |
| 3-3-2             | Sakaro Sodo | 3134 | 2187 | 51989 | 422 | 153 | 9   | 127 | 1148 | 253 | 0   | Asille Group, Kenya |
| 4-1-1             | Sakaro Sodo | 3100 | 2312 | 53020 | 420 | 160 | 10  | 132 | 1182 | 255 | 0   | Asille Group, Kenya |
| 4-1-2             | Sakaro Sodo | 2735 | 2077 | 49349 | 388 | 154 | 9   | 125 | 1160 | 260 | 0   | Asille Group, Kenya |
| 4-1-3             | Sakaro Sodo | 3103 | 2101 | 50685 | 425 | 146 | 9   | 125 | 1131 | 252 | 0   | Asille Group, Kenya |
| RGM1-S4           |             | 1544 | 290  | 13214 | 42  | 150 | 110 | 25  | 217  | 5   | 889 | standard            |
| RGM1-S5           |             | 1488 | 306  | 13029 | 40  | 145 | 106 | 21  | 210  | 7   | 708 | standard            |

2) ELEMENTAL CONCENTRATIONS FOR ALL ARCHAEOLOGICAL SAMPLES FORM SODITI SITE BY UNIT AND SAMPLE NUMBER, AND THE USGS RGM-1 RHYOLITE STANDARD. All measurements in parts per million (ppm) (Shackley 2017: Table 1).

| Unit/Level/<br>Sample | Site   | Ti   | Mn   | Fe    | Zn  | Rb  | Sr | Y   | Zr   | Nb  | Ba | Source              |
|-----------------------|--------|------|------|-------|-----|-----|----|-----|------|-----|----|---------------------|
| 1-1-1                 | Soditi | 2623 | 2076 | 49981 | 424 | 145 | 10 | 133 | 1168 | 262 | 0  | Asille Group, Kenya |
| 1-1-2                 | Soditi | 2581 | 2159 | 49769 | 406 | 134 | 13 | 121 | 1004 | 224 | 0  | Asille Group, Kenya |
| 1-1-3                 | Soditi | 2802 | 2204 | 52502 | 424 | 143 | 11 | 138 | 1165 | 254 | 0  | Asille Group, Kenya |
| 1-1-4                 | Soditi | 2694 | 1823 | 42590 | 409 | 120 | 13 | 100 | 885  | 197 | 0  | Asille Group, Kenya |
| 1-1-5                 | Soditi | 3159 | 2313 | 53458 | 469 | 140 | 19 | 117 | 993  | 210 | 0  | Asille Group, Kenya |
| 1-2-1                 | Soditi | 2896 | 2236 | 52123 | 411 | 157 | 9  | 127 | 1182 | 249 | 26 | Asille Group, Kenya |
| 1-2-2                 | Soditi | 2246 | 1878 | 49683 | 540 | 173 | 9  | 157 | 1795 | 275 | 66 | Sugata, Kenya       |
| 1-2-3                 | Soditi | 2907 | 2262 | 52911 | 519 | 155 | 9  | 122 | 1112 | 241 | 0  | Asille Group, Kenya |
| 1-2-4                 | Soditi | 3243 | 1917 | 46423 | 472 | 137 | 17 | 105 | 963  | 195 | 7  | Asille Group, Kenya |
| 1-3-1                 | Soditi | 3008 | 2073 | 50828 | 443 | 137 | 13 | 115 | 996  | 218 | 0  | Asille Group, Kenya |
| 1-3-2                 | Soditi | 3313 | 2123 | 52216 | 419 | 141 | 15 | 117 | 984  | 210 | 42 | Asille Group, Kenya |
| 1-4-1                 | Soditi | 2982 | 2407 | 55069 | 443 | 161 | 13 | 136 | 1217 | 261 | 1  | Asille Group, Kenya |
| 1-4-2                 | Soditi | 2989 | 2384 | 54369 | 473 | 146 | 9  | 123 | 1020 | 216 | 0  | Asille Group, Kenya |
| 1-4-3                 | Soditi | 3025 | 2126 | 49210 | 487 | 144 | 9  | 114 | 1030 | 222 | 17 | Asille Group, Kenya |
| 1-4-4                 | Soditi | 3278 | 2251 | 52446 | 514 | 152 | 9  | 122 | 1089 | 229 | 29 | Asille Group, Kenya |
| 1-6-1                 | Soditi | 2708 | 2053 | 46319 | 398 | 136 | 10 | 108 | 963  | 203 | 0  | Asille Group, Kenya |
| 1-6-2                 | Soditi | 2757 | 2116 | 49443 | 441 | 136 | 10 | 114 | 975  | 218 | 44 | Asille Group, Kenya |
| 1-7-1                 | Soditi | 2813 | 1988 | 47076 | 470 | 138 | 12 | 122 | 1034 | 215 | 16 | Asille Group, Kenya |
| 1-10-1                | Soditi | 3222 | 2478 | 57867 | 512 | 142 | 16 | 123 | 1014 | 229 | 0  | Asille Group, Kenya |

3) Elemental Concentrations for all Archaeological Samples from Chelba Tututi Site by Unit and Sample Number (Shackley 2016: Table 2).

| Unit/Level /Sample | Ti          | Mn          | Fe           | Zn         | Rb         | Sr        | Y          | Zr          | Nb         | Pb        | Th        | PROBABLE SOURCE     |
|--------------------|-------------|-------------|--------------|------------|------------|-----------|------------|-------------|------------|-----------|-----------|---------------------|
| 1-1-1              | 3133        | 1688        | 28760        | 393        | 129        | 9         | 105        | 948         | 193        | 16        | 20        | Asille Group, Kenya |
| 1-2-1              | 3613        | 1796        | 29738        | 447        | 132        | 13        | 101        | 870         | 177        | 14        | 20        | Asille Group, Kenya |
| 1-2-2              | 3124        | 1925        | 33099        | 480        | 127        | 11        | 111        | 956         | 200        | 10        | 15        | Asille Group, Kenya |
| 1-2-3              | 3439        | 2172        | 36368        | 413        | 129        | 14        | 117        | 972         | 209        | 16        | 16        | Asille Group, Kenya |
| 1-2-4              | 3205        | 2166        | 36679        | 409        | 137        | 11        | 121        | 999         | 214        | 15        | 11        | Asille Group, Kenya |
| 1-3-1              | 2790        | 1731        | 31144        | 394        | 178        | 14        | 149        | 1522        | 262        | 22        | 23        | Sugata, Kenya       |
| 1-3-2              | 3140        | 1791        | 33460        | 452        | 126        | 13        | 113        | 992         | 205        | 14        | 12        | Asille Group, Kenya |
| 1-4-1              | 3083        | 2257        | 38632        | 440        | 151        | 12        | 135        | 1156        | 250        | 14        | 16        | Asille Group, Kenya |
| 1-5-1              | 2132        | 1852        | 37283        | 479        | 250        | 15        | 215        | 1987        | 343        | 36        | 39        | Sugata, Kenya       |
| 1-5-2              | 3107        | 1854        | 35433        | 455        | 156        | 14        | 138        | 1116        | 235        | 17        | 19        | Asille Group, Kenya |
| 2-1-1              | <b>4217</b> | <b>2643</b> | <b>44089</b> | <b>547</b> | <b>164</b> | <b>13</b> | <b>139</b> | <b>1199</b> | <b>257</b> | <b>14</b> | <b>20</b> | Asille Group, Kenya |
| 2-1-2              | 4079        | 2646        | 43257        | 438        | 157        | 12        | 128        | 1108        | 238        | 14        | 13        | Asille Group, Kenya |
| 2-1-3              | 3097        | 2131        | 36722        | 401        | 151        | 10        | 132        | 1149        | 255        | 16        | 24        | Asille Group, Kenya |
| 2-1-4              | 3530        | 2394        | 40469        | 461        | 154        | 11        | 134        | 1184        | 249        | 16        | 17        | Asille Group, Kenya |
| 2-1-5              | 3516        | 2196        | 37689        | 448        | 148        | 10        | 127        | 1111        | 235        | 15        | 28        | Asille Group, Kenya |
| 2-1-6              | 2419        | 1156        | 23357        | 242        | 94         | 12        | 87         | 792         | 179        | 7         | 10        | Asille Group, Kenya |
| 2-1-7              | 3752        | 2415        | 40285        | 444        | 160        | 11        | 133        | 1198        | 246        | 19        | 14        | Asille Group, Kenya |
| 2-1-8              | 3914        | 2315        | 40309        | 446        | 157        | 9         | 136        | 1165        | 246        | 12        | 17        | Asille Group, Kenya |
| 2-1-9              | 2416        | 2469        | 43710        | 624        | 281        | 19        | 291        | 2307        | 440        | 41        | 40        | Sugata, Kenya       |
| 2-1-10             | 3421        | 2209        | 38035        | 432        | 153        | 11        | 132        | 1183        | 251        | 16        | 14        | Asille Group, Kenya |
| 2-1-11             | 2228        | 2133        | 40543        | 543        | 258        | 11        | 225        | 1997        | 341        | 39        | 33        | Sugata, Kenya       |
| 2-1-12             | 3794        | 2118        | 37109        | 398        | 149        | 10        | 132        | 1144        | 242        | 15        | 22        | Asille Group, Kenya |
| 2-1-13             | 4117        | 2813        | 45072        | 479        | 167        | 9         | 147        | 1227        | 256        | 15        | 19        | Asille Group, Kenya |
| 2-1-14             | 3846        | 2299        | 39550        | 422        | 137        | 11        | 128        | 1022        | 214        | 13        | 14        | Asille Group, Kenya |
| 2-1-15             | 1806        | 1551        | 31691        | 398        | 241        | 12        | 214        | 1928        | 339        | 30        | 41        | Sugata, Kenya       |
| 2-1-16             | 4598        | 1805        | 31291        | 315        | 136        | 11        | 110        | 1002        | 211        | 15        | 24        | Asille Group, Kenya |
| 2-1-17             | 5438        | 2235        | 39974        | 385        | 151        | 12        | 136        | 1174        | 250        | 16        | 20        | Asille Group, Kenya |
| 2-1-18             | 5112        | 2854        | 46236        | 478        | 167        | 12        | 142        | 1262        | 270        | 17        | 20        | Asille Group, Kenya |
| 2-1-19             | 258         | 2799        | 214297       | 46         | 7          | 21        | 9          | 83          | 1          | -1        | 5         | not obsidian        |
| 2-1-20             | 4022        | 2425        | 41398        | 445        | 162        | 11        | 139        | 1215        | 259        | 15        | 27        | Asille Group, Kenya |
| 2-2-1              | 3433        | 2197        | 37955        | 419        | 155        | 12        | 133        | 1156        | 252        | 14        | 20        | Asille Group, Kenya |
| 2-2-2              | 3500        | 2048        | 36053        | 383        | 145        | 9         | 129        | 1132        | 241        | 14        | 20        | Asille Group, Kenya |
| 2-2-3              | 3820        | 2210        | 38601        | 403        | 151        | 12        | 135        | 1173        | 247        | 19        | 23        | Asille Group, Kenya |
| 2-2-4              | 4581        | 2226        | 39103        | 399        | 150        | 15        | 130        | 1142        | 245        | 17        | 13        | Asille Group, Kenya |
| 2-2-5              | 3553        | 2281        | 38801        | 417        | 152        | 9         | 131        | 1166        | 249        | 15        | 16        | Asille Group, Kenya |
| 2-2-6              | 3725        | 2275        | 39356        | 412        | 155        | 10        | 136        | 1174        | 247        | 14        | 20        | Asille Group, Kenya |
| 2-2-7              | 1752        | 1457        | 29058        | 370        | 228        | 12        | 180        | 1920        | 363        | 27        | 32        | Sugata, Kenya       |
| 2-2-8              | 3670        | 2280        | 38852        | 424        | 151        | 12        | 137        | 1175        | 251        | 20        | 16        | Asille Group, Kenya |
| 2-2-9              | 4344        | 1982        | 36032        | 365        | 174        | 11        | 129        | 1121        | 242        | 16        | 14        | Asille Group, Kenya |
| 2-2-10             | 3073        | 2156        | 37187        | 378        | 141        | 12        | 131        | 1046        | 220        | 13        | 17        | Asille Group, Kenya |
| 2-2-11             | 3261        | 2238        | 38165        | 408        | 155        | 9         | 134        | 1167        | 258        | 16        | 14        | Asille Group, Kenya |
| 2-2-12             | 2506        | 1811        | 36110        | 469        | 256        | 9         | 264        | 2201        | 432        | 33        | 35        | Sugata, Kenya       |
| 2-2-13             | 1370        | 1339        | 28176        | 346        | 212        | 10        | 192        | 1751        | 307        | 30        | 28        | Sugata, Kenya       |
| 2-2-14             | 1323        | 1305        | 27479        | 449        | 140        | 13        | 193        | 1576        | 225        | 28        | 19        | unknown             |

|              |             |             |              |            |            |           |            |             |            |           |           |                     |
|--------------|-------------|-------------|--------------|------------|------------|-----------|------------|-------------|------------|-----------|-----------|---------------------|
| 2-2-15       | 2786        | 1601        | 29846        | 365        | 169        | 13        | 146        | 1471        | 253        | 18        | 23        | Sugata, Kenya       |
| 2-2-16       | 4901        | 2032        | 37233        | 363        | 133        | 12        | 116        | 1002        | 218        | 12        | 15        | Asille Group, Kenya |
| 2-2-17       | 3315        | 2135        | 36830        | 396        | 149        | 10        | 134        | 1151        | 244        | 17        | 25        | Asille Group, Kenya |
| 2-2-18       | 3664        | 2100        | 36640        | 357        | 131        | 12        | 121        | 998         | 215        | 12        | 14        | Asille Group, Kenya |
| 2-2-19       | 2042        | 1598        | 30773        | 391        | 227        | 13        | 178        | 1892        | 351        | 31        | 34        | Sugata, Kenya       |
| 2-2-20       | 3430        | 2517        | 40361        | 423        | 153        | 9         | 139        | 1191        | 252        | 14        | 20        | Asille Group, Kenya |
| 2-2-21       | 2796        | 1778        | 29559        | 294        | 135        | 11        | 108        | 1017        | 208        | 14        | 15        | Asille Group, Kenya |
| 2-2-22       | 2689        | 2272        | 40242        | 533        | 283        | 12        | 199        | 2153        | 387        | 34        | 32        | Sugata, Kenya       |
| 2-2-23       | 3537        | 2460        | 41466        | 443        | 166        | 13        | 147        | 1261        | 266        | 15        | 18        | Asille Group, Kenya |
| 2-2-24       | 3250        | 2023        | 35080        | 343        | 134        | 11        | 122        | 1020        | 217        | 10        | 19        | Asille Group, Kenya |
| 2-2-25       | 3091        | 1951        | 34657        | 328        | 128        | 12        | 124        | 997         | 216        | 9         | 19        | Asille Group, Kenya |
| 2-2-26       | 3605        | 2059        | 33713        | 384        | 157        | 14        | 118        | 1051        | 208        | 16        | 19        | Asille Group, Kenya |
| 2-2-27       | 3614        | 2064        | 36610        | 386        | 138        | 10        | 125        | 1008        | 216        | 10        | 17        | Asille Group, Kenya |
| 2-2-28       | 2957        | 1572        | 27916        | 358        | 133        | 12        | 103        | 936         | 195        | 14        | 15        | Asille Group, Kenya |
| 2-2-29       | 3709        | 2065        | 36788        | 396        | 148        | 15        | 132        | 1138        | 237        | 15        | 17        | Asille Group, Kenya |
| 2-2-30       | 4007        | 2272        | 39621        | 416        | 156        | 12        | 134        | 1172        | 254        | 18        | 20        | Asille Group, Kenya |
| 2-2-31       | 3767        | 2001        | 35281        | 396        | 165        | 13        | 128        | 1128        | 235        | 15        | 21        | Asille Group, Kenya |
| 2-2-32       | 3439        | 2083        | 36651        | 395        | 148        | 14        | 132        | 1145        | 244        | 12        | 17        | Asille Group, Kenya |
| 2-2-33       | 3447        | 2093        | 36805        | 378        | 136        | 11        | 125        | 1022        | 223        | 13        | 17        | Asille Group, Kenya |
| 2-2-34       | 2408        | 1180        | 26949        | 403        | 139        | 16        | 182        | 1501        | 217        | 24        | 20        | unknown             |
| 2-2-35       | 3416        | 2216        | 38108        | 420        | 154        | 10        | 134        | 1161        | 247        | 15        | 15        | Asille Group, Kenya |
| 2-3-1        | 2006        | 1583        | 32625        | 632        | 161        | 16        | 215        | 1749        | 247        | 31        | 12        | unknown             |
| 2-3-2        | 5865        | 1608        | 36781        | 403        | 233        | 15        | 177        | 1942        | 358        | 31        | 34        | Sugata, Kenya       |
| 2-3-3        | 4716        | 2149        | 39586        | 410        | 145        | 12        | 132        | 1138        | 243        | 15        | 13        | Asille Group, Kenya |
| 2-3-4        | 3312        | 1837        | 31092        | 383        | 145        | 12        | 113        | 997         | 200        | 15        | 27        | Asille Group, Kenya |
| 2-3-5        | 3268        | 1903        | 33987        | 385        | 147        | 13        | 113        | 967         | 205        | 14        | 22        | Asille Group, Kenya |
| 2-3-6        | 3484        | 2174        | 37330        | 428        | 142        | 13        | 128        | 1031        | 218        | 11        | 18        | Asille Group, Kenya |
| 2-3-7        | 7186        | 2204        | 43155        | 413        | 140        | 19        | 134        | 1038        | 214        | 12        | 11        | Asille Group, Kenya |
| 2-3-8        | 3587        | 2240        | 38177        | 404        | 141        | 9         | 129        | 1033        | 219        | 12        | 20        | Asille Group, Kenya |
| 2-3-9        | 3744        | 2260        | 37692        | 459        | 143        | 11        | 120        | 952         | 200        | 11        | 10        | Asille Group, Kenya |
| 2-3-10       | 2153        | 1833        | 34238        | 489        | 254        | 14        | 187        | 1949        | 361        | 32        | 35        | Sugata, Kenya       |
| 2-3-11       | 3371        | 2402        | 40418        | 463        | 158        | 11        | 136        | 1162        | 246        | 15        | 26        | Asille Group, Kenya |
| 2-3-12       | 3124        | 2069        | 36047        | 395        | 145        | 12        | 126        | 1124        | 239        | 13        | 15        | Asille Group, Kenya |
| 2-3-13       | 4302        | 1777        | 36089        | 431        | 243        | 13        | 190        | 1962        | 361        | 29        | 38        | Sugata, Kenya       |
| 2-3-14       | 3752        | 2149        | 37897        | 392        | 141        | 11        | 122        | 1042        | 227        | 9         | 14        | Asille Group, Kenya |
| 2-3-15       | 3559        | 2191        | 37930        | 374        | 139        | 13        | 126        | 1039        | 219        | 14        | 23        | Asille Group, Kenya |
| 2-4-1        | 7498        | 1811        | 42012        | 417        | 252        | 17        | 195        | 2027        | 367        | 35        | 32        | Sugata, Kenya       |
| 2-4-2        | 3210        | 2175        | 37271        | 395        | 146        | 11        | 131        | 1155        | 249        | 16        | 20        | Asille Group, Kenya |
| 2-4-3        | 3700        | 2084        | 37553        | 379        | 150        | 12        | 140        | 1169        | 249        | 17        | 13        | Asille Group, Kenya |
| 2-4-4        | 4281        | 1825        | 36752        | 461        | 251        | 12        | 188        | 1983        | 361        | 31        | 39        | Sugata, Kenya       |
| 2-4-5        | 4797        | 1135        | 27724        | 275        | 139        | 19        | 111        | 1074        | 167        | 17        | 16        | Asille Group, Kenya |
| 2-4-6        | 4662        | 1791        | 37075        | 362        | 165        | 16        | 150        | 1178        | 253        | 14        | 19        | Asille Group, Kenya |
| 2-4-7        | 3831        | 1865        | 37344        | 409        | 165        | 14        | 153        | 1179        | 248        | 19        | 22        | Asille Group, Kenya |
| 2-4-8        | 2954        | 1729        | 33711        | 440        | 242        | 13        | 183        | 1953        | 356        | 28        | 25        | Sugata, Kenya       |
| 2-4-9        | 3504        | 2180        | 37496        | 540        | 143        | 9         | 119        | 1017        | 208        | 16        | 17        | Asille Group, Kenya |
| 2-4-10       | 3665        | 2400        | 40414        | 576        | 151        | 13        | 121        | 1044        | 221        | 18        | 23        | Asille Group, Kenya |
| <b>3-1-1</b> | <b>6960</b> | <b>1682</b> | <b>36235</b> | <b>312</b> | <b>157</b> | <b>16</b> | <b>149</b> | <b>1155</b> | <b>242</b> | <b>17</b> | <b>23</b> | Asille Group, Kenya |
| 3-1-2        | 3238        | 2259        | 38622        | 396        | 144        | 10        | 128        | 1046        | 229        | 13        | 28        | Asille Group, Kenya |

|              |             |             |              |            |            |           |            |             |            |           |           |                     |
|--------------|-------------|-------------|--------------|------------|------------|-----------|------------|-------------|------------|-----------|-----------|---------------------|
| 3-1-3        | 3176        | 2274        | 37486        | 399        | 146        | 9         | 134        | 1146        | 253        | 15        | 20        | Asille Group, Kenya |
| 3-1-4        | 8443        | 1580        | 35977        | 296        | 153        | 17        | 146        | 1157        | 243        | 20        | 20        | Asille Group, Kenya |
| 3-1-5        | 6347        | 2132        | 41171        | 398        | 185        | 14        | 161        | 1283        | 268        | 21        | 31        | Asille Group, Kenya |
| 3-1-6        | 3980        | 2358        | 38318        | 366        | 140        | 10        | 115        | 986         | 216        | 12        | 13        | Asille Group, Kenya |
| 3-1-7        | 12471       | 1611        | 41548        | 359        | 143        | 18        | 146        | 1707        | 264        | 14        | 21        | unknown             |
| 3-1-8        | 3002        | 2082        | 35493        | 366        | 146        | 9         | 126        | 1027        | 220        | 14        | 13        | Asille Group, Kenya |
| 3-1-9        | 3301        | 1811        | 30806        | 334        | 144        | 9         | 114        | 1033        | 208        | 14        | 20        | Asille Group, Kenya |
| 3-1-10       | 3509        | 1884        | 31232        | 336        | 144        | 10        | 112        | 1039        | 222        | 15        | 20        | Asille Group, Kenya |
| 3-1-11       | 3390        | 2138        | 36801        | 397        | 137        | 12        | 128        | 1023        | 216        | 12        | 11        | Asille Group, Kenya |
| 3-1-12       | 4055        | 2324        | 35846        | 391        | 154        | 9         | 116        | 1063        | 220        | 19        | 30        | Asille Group, Kenya |
| 3-1-13       | 2010        | 1748        | 33838        | 485        | 248        | 9         | 189        | 1976        | 360        | 27        | 43        | Sugata, Kenya       |
| 3-1-14       | 3589        | 2169        | 37586        | 400        | 141        | 10        | 130        | 1041        | 221        | 14        | 16        | Asille Group, Kenya |
| 3-1-15       | 3168        | 2234        | 36904        | 410        | 148        | 10        | 131        | 1154        | 249        | 18        | 18        | Asille Group, Kenya |
| 3-1-16       | 3239        | 2385        | 39917        | 450        | 161        | 9         | 136        | 1194        | 248        | 18        | 14        | Asille Group, Kenya |
| 3-1-17       | 3666        | 2309        | 38103        | 423        | 138        | 10        | 125        | 1001        | 212        | 12        | 19        | Asille Group, Kenya |
| 3-1-18       | 1302        | 1375        | 28957        | 519        | 150        | 13        | 218        | 1742        | 249        | 25        | 22        | unknown             |
| 3-1-19       | 1708        | 1848        | 36177        | 494        | 257        | 13        | 232        | 2019        | 348        | 38        | 32        | Sugata, Kenya       |
| 3-1-20       | 3664        | 2490        | 41259        | 487        | 146        | 12        | 124        | 1027        | 214        | 15        | 22        | Asille Group, Kenya |
| 3-2-1        | 11940       | 2151        | 51951        | 359        | 142        | 32        | 123        | 1140        | 243        | 16        | 17        | Asille Group, Kenya |
| 3-2-2        | 3231        | 2064        | 35691        | 432        | 129        | 14        | 118        | 931         | 195        | 12        | 11        | Asille Group, Kenya |
| 3-2-3        | 3222        | 2101        | 36410        | 433        | 134        | 11        | 126        | 1000        | 205        | 11        | 17        | Asille Group, Kenya |
| 3-2-4        | 4609        | 2269        | 36879        | 442        | 160        | 13        | 120        | 1070        | 211        | 17        | 15        | Asille Group, Kenya |
| 3-2-5        | 3416        | 2123        | 37173        | 415        | 150        | 12        | 133        | 1121        | 239        | 14        | 21        | Asille Group, Kenya |
| 3-2-6        | 2765        | 2007        | 34746        | 427        | 130        | 12        | 116        | 961         | 212        | 14        | 23        | Asille Group, Kenya |
| 3-4-1        | 4131        | 2064        | 36713        | 480        | 127        | 13        | 110        | 879         | 179        | 12        | 18        | Asille Group, Kenya |
| <b>4-1-1</b> | <b>4418</b> | <b>2464</b> | <b>42204</b> | <b>419</b> | <b>145</b> | <b>12</b> | <b>130</b> | <b>1056</b> | <b>223</b> | <b>11</b> | <b>13</b> | Asille Group, Kenya |
| 4-1-2        | 3568        | 2212        | 38718        | 408        | 144        | 13        | 123        | 1026        | 220        | 11        | 25        | Asille Group, Kenya |
| 4-1-3        | 2888        | 2056        | 36388        | 389        | 150        | 15        | 137        | 1168        | 250        | 12        | 19        | Asille Group, Kenya |
| 4-1-4        | 2971        | 2081        | 36037        | 373        | 139        | 13        | 130        | 1042        | 222        | 13        | 20        | Asille Group, Kenya |
| 4-1-5        | 1327        | 915         | 21764        | 339        | 109        | 17        | 147        | 1158        | 164        | 19        | 8         | Fantale             |
| 4-1-6        | 4014        | 2381        | 40305        | 428        | 147        | 14        | 129        | 1062        | 227        | 13        | 26        | Asille Group, Kenya |
| 4-1-7        | 3076        | 2076        | 36592        | 404        | 155        | 9         | 130        | 1157        | 242        | 11        | 19        | Asille Group, Kenya |
| 4-1-8        | 3229        | 2252        | 38508        | 410        | 147        | 12        | 132        | 1048        | 223        | 15        | 12        | Asille Group, Kenya |
| 4-1-9        | 3160        | 2373        | 39700        | 459        | 158        | 13        | 134        | 1179        | 242        | 18        | 19        | Asille Group, Kenya |
| 4-1-10       | 2819        | 2172        | 42871        | 507        | 238        | 17        | 229        | 1924        | 353        | 37        | 20        | Sugata, Kenya       |
| 4-1-11       | 3366        | 2174        | 38134        | 414        | 154        | 9         | 134        | 1165        | 246        | 15        | 20        | Asille Group, Kenya |
| 4-1-12       | 3359        | 2403        | 39853        | 456        | 160        | 10        | 140        | 1203        | 256        | 17        | 10        | Asille Group, Kenya |
| 4-1-13       | 6158        | 2577        | 43415        | 450        | 147        | 15        | 128        | 1044        | 225        | 15        | 14        | Asille Group, Kenya |
| 4-1-14       | 6589        | 2135        | 39876        | 361        | 130        | 14        | 122        | 1012        | 213        | 11        | 15        | Asille Group, Kenya |
| 4-1-15       | 4139        | 2009        | 33667        | 349        | 148        | 9         | 116        | 1048        | 205        | 17        | 18        | Asille Group, Kenya |
| 4-2-1        | 3268        | 2436        | 40942        | 446        | 169        | 14        | 140        | 1219        | 253        | 13        | 11        | Asille Group, Kenya |
| 4-2-2        | 3238        | 2227        | 38760        | 421        | 139        | 9         | 128        | 1026        | 216        | 17        | 11        | Asille Group, Kenya |
| 4-2-3        | 2989        | 2185        | 37290        | 400        | 138        | 13        | 127        | 1015        | 218        | 11        | 15        | Asille Group, Kenya |
| 4-2-4        | 1917        | 2940        | 44692        | 815        | 380        | 16        | 432        | 3580        | 664        | 64        | 55        | Sugata, Kenya       |
| 4-2-5        | 2222        | 1941        | 35676        | 487        | 264        | 9         | 195        | 2016        | 366        | 31        | 43        | Sugata, Kenya       |
| 4-2-6        | 3288        | 2135        | 36657        | 404        | 162        | 12        | 133        | 1165        | 248        | 17        | 21        | Asille Group, Kenya |
| 4-2-7        | 1098        | 638         | 17515        | 201        | 120        | 14        | 88         | 882         | 119        | 18        | 24        | Abadir              |
| 4-2-8        | 2806        | 2053        | 35863        | 388        | 150        | 10        | 132        | 1159        | 246        | 15        | 25        | Asille Group, Kenya |

|        |      |      |       |     |     |    |     |      |     |    |    |                     |
|--------|------|------|-------|-----|-----|----|-----|------|-----|----|----|---------------------|
| 4-2-9  | 3211 | 2296 | 38332 | 423 | 155 | 13 | 137 | 1194 | 251 | 17 | 17 | Asille Group, Kenya |
| 4-2-10 | 3716 | 2391 | 39494 | 420 | 142 | 9  | 126 | 1030 | 221 | 13 | 12 | Asille Group, Kenya |
| 4-3-1  | 3537 | 2288 | 37348 | 364 | 136 | 14 | 113 | 970  | 214 | 12 | 19 | Asille Group, Kenya |
| 4-3-2  | 3298 | 2230 | 37972 | 399 | 156 | 15 | 136 | 1173 | 247 | 17 | 11 | Asille Group, Kenya |
| 4-3-3  | 2757 | 1713 | 31046 | 338 | 153 | 9  | 127 | 1085 | 229 | 12 | 17 | Asille Group, Kenya |
| 4-3-4  | 3503 | 2325 | 39090 | 404 | 139 | 13 | 134 | 1045 | 217 | 11 | 22 | Asille Group, Kenya |
| 4-3-5  | 3809 | 1940 | 37821 | 399 | 169 | 13 | 115 | 1206 | 242 | 13 | 19 | Asille Group, Kenya |
| 4-3-6  | 2793 | 2129 | 36588 | 395 | 136 | 10 | 119 | 1020 | 219 | 11 | 23 | Asille Group, Kenya |
| 4-3-7  | 3946 | 2488 | 41724 | 463 | 160 | 14 | 137 | 1196 | 254 | 17 | 13 | Asille Group, Kenya |
| 4-3-8  | 4105 | 2311 | 39695 | 442 | 144 | 10 | 130 | 1021 | 213 | 10 | 16 | Asille Group, Kenya |
| 4-4-1  | 2615 | 1554 | 31186 | 322 | 155 | 13 | 139 | 1162 | 249 | 18 | 26 | Asille Group, Kenya |
| 4-4-2  | 3605 | 2136 | 37800 | 423 | 150 | 15 | 133 | 1145 | 246 | 16 | 25 | Asille Group, Kenya |
| 4-4-3  | 4115 | 2223 | 38163 | 366 | 144 | 11 | 129 | 1048 | 222 | 10 | 11 | Asille Group, Kenya |
| 4-4-4  | 3582 | 2311 | 38775 | 393 | 140 | 14 | 125 | 1054 | 226 | 14 | 12 | Asille Group, Kenya |
| 4-4-5  | 3189 | 2384 | 40276 | 461 | 161 | 12 | 138 | 1188 | 253 | 13 | 24 | Asille Group, Kenya |
| 4-4-6  | 1653 | 1858 | 36712 | 506 | 261 | 9  | 221 | 1994 | 342 | 39 | 34 | Sugata, Kenya       |
| 4-4-7  | 4594 | 2283 | 40195 | 405 | 134 | 11 | 128 | 1027 | 215 | 15 | 16 | Asille Group, Kenya |
| 4-4-8  | 2411 | 2047 | 40367 | 496 | 235 | 13 | 226 | 1888 | 355 | 30 | 37 | Sugata, Kenya       |
| 4-4-9  | 4368 | 2252 | 39509 | 418 | 152 | 13 | 141 | 1168 | 248 | 16 | 18 | Asille Group, Kenya |
| 4-4-10 | 4470 | 1665 | 34459 | 358 | 155 | 12 | 148 | 1155 | 251 | 18 | 24 | Asille Group, Kenya |
| 4-5-1  | 3413 | 2385 | 40207 | 433 | 146 | 9  | 128 | 1050 | 226 | 19 | 28 | Asille Group, Kenya |
| 4-5-2  | 5881 | 2757 | 47728 | 461 | 137 | 14 | 121 | 1053 | 228 | 14 | 19 | Asille Group, Kenya |
| 4-5-3  | 3807 | 2585 | 42506 | 495 | 153 | 13 | 134 | 1065 | 220 | 16 | 16 | Asille Group, Kenya |
| 4-5-4  | 2043 | 2115 | 40358 | 587 | 264 | 14 | 223 | 2014 | 334 | 45 | 36 | Sugata, Kenya       |
| 4-6-1  | 1344 | 1171 | 25221 | 402 | 157 | 12 | 177 | 1468 | 210 | 24 | 15 | unknown             |
| 5-1-1  | 1913 | 2177 | 40017 | 610 | 273 | 14 | 274 | 2226 | 423 | 36 | 43 | Sugata, Kenya       |
| 5-1-2  | 1904 | 2054 | 40041 | 497 | 241 | 15 | 228 | 1866 | 346 | 28 | 43 | Sugata, Kenya       |
| 5-1-3  | 3476 | 2470 | 41643 | 474 | 159 | 15 | 140 | 1187 | 253 | 17 | 18 | Asille Group, Kenya |
| 5-5-1  | 1841 | 1665 | 33494 | 619 | 157 | 17 | 210 | 1618 | 226 | 30 | 15 | unknown             |
| 6-1-1  | 3742 | 2284 | 39493 | 439 | 154 | 12 | 140 | 1177 | 246 | 18 | 35 | Asille Group, Kenya |
| 6-1-2  | 3532 | 2072 | 35984 | 374 | 138 | 9  | 120 | 1004 | 216 | 11 | 27 | Asille Group, Kenya |
| 6-2-1  | 2145 | 1731 | 32385 | 428 | 253 | 11 | 190 | 1990 | 369 | 31 | 32 | Sugata, Kenya       |
| 6-2-2  | 3856 | 2609 | 42502 | 494 | 153 | 10 | 133 | 1046 | 225 | 17 | 35 | Asille Group, Kenya |
| 6-2-3  | 3173 | 2269 | 37520 | 378 | 141 | 11 | 123 | 1025 | 218 | 13 | 11 | Asille Group, Kenya |
| 6-2-4  | 1774 | 1346 | 28362 | 507 | 150 | 10 | 198 | 1567 | 222 | 25 | 17 | unknown             |
| 6-2-5  | 3708 | 2164 | 37856 | 441 | 148 | 10 | 134 | 1133 | 235 | 17 | 23 | Asille Group, Kenya |
| 6-2-6  | 3676 | 2239 | 38843 | 428 | 154 | 10 | 136 | 1166 | 249 | 14 | 15 | Asille Group, Kenya |
| 6-3-1  | 2934 | 2258 | 37638 | 392 | 141 | 10 | 128 | 1047 | 225 | 13 | 20 | Asille Group, Kenya |
| 6-3-2  | 3622 | 1893 | 34145 | 351 | 161 | 11 | 129 | 1141 | 245 | 14 | 20 | Asille Group, Kenya |
| 6-3-3  | 3093 | 2316 | 37772 | 416 | 151 | 9  | 133 | 1167 | 246 | 15 | 20 | Asille Group, Kenya |
| 6-3-4  | 3345 | 2222 | 38407 | 414 | 152 | 12 | 133 | 1169 | 250 | 13 | 17 | Asille Group, Kenya |
| 6-3-5  | 3288 | 2197 | 37491 | 389 | 141 | 12 | 123 | 1016 | 221 | 13 | 18 | Asille Group, Kenya |
| 6-3-6  | 3047 | 2211 | 37347 | 426 | 151 | 10 | 132 | 1159 | 246 | 14 | 15 | Asille Group, Kenya |
| 6-3-7  | 1897 | 2925 | 44554 | 796 | 378 | 16 | 439 | 3599 | 680 | 63 | 71 | Sugata, Kenya       |
| 6-3-8  | 1884 | 1675 | 32029 | 423 | 243 | 11 | 186 | 1961 | 359 | 30 | 27 | Sugata, Kenya       |
| 6-3-9  | 1909 | 3054 | 46496 | 683 | 225 | 13 | 225 | 1847 | 386 | 25 | 27 | Sugata, Kenya       |
| 6-3-10 | 7080 | 2412 | 42506 | 407 | 151 | 13 | 133 | 1170 | 251 | 15 | 17 | Asille Group, Kenya |
| 6-3-11 | 3354 | 2396 | 39941 | 478 | 158 | 9  | 132 | 1190 | 249 | 12 | 14 | Asille Group, Kenya |

|        |      |      |       |     |     |    |     |      |     |    |    |                     |
|--------|------|------|-------|-----|-----|----|-----|------|-----|----|----|---------------------|
| 6-3-12 | 1799 | 2855 | 43652 | 618 | 224 | 13 | 226 | 1836 | 373 | 22 | 25 | Sugata, Kenya       |
| 6-3-13 | 3697 | 2157 | 37466 | 416 | 139 | 11 | 130 | 1009 | 220 | 9  | 16 | Asille Group, Kenya |
| 6-3-14 | 3137 | 1721 | 29124 | 336 | 128 | 11 | 103 | 955  | 197 | 15 | 20 | Asille Group, Kenya |
| 6-3-15 | 3053 | 1881 | 30600 | 346 | 145 | 12 | 110 | 1020 | 205 | 11 | 21 | Asille Group, Kenya |
| 6-3-16 | 2984 | 2158 | 37246 | 426 | 149 | 13 | 135 | 1162 | 254 | 11 | 21 | Asille Group, Kenya |
| 6-3-17 | 1544 | 1371 | 28774 | 485 | 144 | 18 | 200 | 1606 | 226 | 28 | 22 | unknown             |
| 6-4-1  | 3564 | 2136 | 37301 | 375 | 136 | 13 | 129 | 1029 | 218 | 15 | 17 | Asille Group, Kenya |
| 6-4-2  | 3567 | 2218 | 36438 | 366 | 129 | 9  | 117 | 959  | 210 | 9  | 13 | Asille Group, Kenya |
| 6-4-3  | 8382 | 2185 | 42981 | 372 | 131 | 16 | 119 | 1019 | 222 | 14 | 20 | Asille Group, Kenya |
| 6-4-4  | 1395 | 1404 | 29485 | 518 | 147 | 14 | 211 | 1680 | 235 | 22 | 13 | unknown             |
| 6-4-5  | 3566 | 1851 | 35744 | 471 | 163 | 15 | 144 | 1122 | 231 | 20 | 22 | Asille Group, Kenya |
| 6-4-6  | 260  | 623  | 20379 | 91  | -3  | 10 | 3   | 19   | 1   | 1  | 5  | not obsidian        |
| 6-4-7  | 2884 | 1821 | 29780 | 369 | 139 | 11 | 115 | 985  | 197 | 17 | 24 | Asille Group, Kenya |
| 6-4-8  | 3450 | 2243 | 38183 | 396 | 139 | 13 | 124 | 1044 | 225 | 12 | 21 | Asille Group, Kenya |
| 6-4-9  | 3603 | 2134 | 36352 | 392 | 146 | 12 | 130 | 1146 | 248 | 12 | 23 | Asille Group, Kenya |
| 6-4-10 | 3314 | 2004 | 32039 | 453 | 150 | 9  | 109 | 1004 | 205 | 16 | 22 | Asille Group, Kenya |
| 6-4-11 | 3350 | 2296 | 38311 | 461 | 146 | 11 | 128 | 1105 | 234 | 14 | 9  | Asille Group, Kenya |
| 6-4-12 | 3832 | 2312 | 39027 | 401 | 139 | 12 | 127 | 1009 | 217 | 11 | 10 | Asille Group, Kenya |
| 6-5-1  | 4034 | 2168 | 35442 | 367 | 152 | 14 | 122 | 1087 | 219 | 15 | 21 | Asille Group, Kenya |
| 6-5-2  | 3317 | 2411 | 39906 | 425 | 145 | 10 | 130 | 1075 | 228 | 16 | 22 | Asille Group, Kenya |
| 6-5-3  | 1649 | 1329 | 27953 | 496 | 141 | 10 | 197 | 1569 | 221 | 21 | 18 | unknown             |
| 6-5-4  | 3169 | 2245 | 37642 | 416 | 157 | 10 | 134 | 1161 | 248 | 17 | 20 | Asille Group, Kenya |
| 6-5-5  | 3353 | 1890 | 30930 | 464 | 142 | 11 | 106 | 958  | 198 | 15 | 18 | Asille Group, Kenya |
| 6-5-6  | 4822 | 2668 | 45405 | 531 | 154 | 13 | 134 | 1178 | 250 | 18 | 20 | Asille Group, Kenya |
| 6-5-7  | 1448 | 1311 | 28180 | 473 | 142 | 14 | 192 | 1575 | 223 | 24 | 25 | unknown             |
| 6-5-8  | 2161 | 2908 | 44611 | 866 | 375 | 18 | 424 | 3500 | 651 | 64 | 60 | Sugata, Kenya       |
| 6-6-1  | 3432 | 2352 | 39330 | 413 | 149 | 11 | 135 | 1064 | 228 | 17 | 20 | Asille Group, Kenya |
| 6-6-2  | 3224 | 2091 | 36809 | 408 | 139 | 9  | 128 | 1036 | 223 | 14 | 23 | Asille Group, Kenya |
| 6-6-3  | 3242 | 2176 | 36952 | 380 | 140 | 12 | 122 | 1037 | 223 | 14 | 20 | Asille Group, Kenya |
| 6-6-4  | 2766 | 1700 | 31547 | 434 | 179 | 11 | 149 | 1510 | 261 | 25 | 21 | Sugata, Kenya       |
| 6-6-5  | 3140 | 1968 | 31716 | 387 | 147 | 11 | 111 | 1025 | 214 | 16 | 23 | Asille Group, Kenya |
| 6-7-1  | 4716 | 2025 | 37236 | 395 | 156 | 13 | 120 | 1007 | 210 | 15 | 13 | Asille Group, Kenya |
| 6-7-2  | 1503 | 1486 | 29894 | 509 | 153 | 14 | 213 | 1716 | 248 | 25 | 23 | unknown             |

4) Elemental Concentrations for all Archaeological Samples Form Tuto Fela Site by unit and sample number, and the USGS RGM-1 Rhyolite Standard. All measurements in parts per million (ppm) (Shackley 2017: Table 1).

| Unit/<br>Sample       | Site      | Ti   | Mn   | Fe    | Zn  | Rb  | Sr | Y   | Zr   | Nb  | Ba | Source              |
|-----------------------|-----------|------|------|-------|-----|-----|----|-----|------|-----|----|---------------------|
| Surface<br>collection | Tuto Fela | 3461 | 1929 | 44236 | 354 | 137 | 12 | 115 | 1050 | 234 | 28 | Asille Group, Kenya |
|                       | Tuto Fela | 2792 | 2256 | 50766 | 384 | 143 | 13 | 120 | 1042 | 230 | 0  | Asille Group, Kenya |
|                       | Tuto Fela | 3139 | 2400 | 55489 | 436 | 155 | 9  | 136 | 1228 | 271 | 0  | Asille Group, Kenya |
|                       | Tuto Fela | 2886 | 2215 | 51796 | 404 | 155 | 9  | 141 | 1188 | 260 | 0  | Asille Group, Kenya |
|                       | Tuto Fela | 1770 | 1608 | 39890 | 415 | 238 | 9  | 176 | 1913 | 368 | 0  | Sugata, Kenya       |
|                       | Tuto Fela | 2709 | 1996 | 47149 | 338 | 134 | 10 | 118 | 1013 | 218 | 0  | Asille Group, Kenya |
|                       | Tuto Fela | 3081 | 2308 | 55734 | 440 | 160 | 11 | 123 | 1193 | 259 | 0  | Asille Group, Kenya |
|                       | Tuto Fela | 2632 | 2105 | 47917 | 349 | 137 | 10 | 119 | 1012 | 219 | 12 | Asille Group, Kenya |
|                       | Tuto Fela | 3092 | 2373 | 56344 | 427 | 142 | 11 | 128 | 1036 | 221 | 0  | Asille Group, Kenya |
|                       | Tuto Fela | 1610 | 1265 | 34734 | 424 | 136 | 17 | 176 | 1496 | 216 | 86 | Sugata, Kenya       |
|                       | Tuto Fela | 2960 | 2121 | 49094 | 382 | 146 | 11 | 132 | 1147 | 254 | 0  | Asille Group, Kenya |
|                       | Tuto Fela | 2464 | 1829 | 39366 | 310 | 142 | 13 | 107 | 1022 | 222 | 0  | Asille Group, Kenya |
|                       | Tuto Fela | 1388 | 1314 | 35635 | 484 | 164 | 15 | 202 | 1719 | 246 | 37 | Sugata, Kenya       |
|                       | Tuto Fela | 2047 | 1772 | 43384 | 417 | 248 | 9  | 182 | 1987 | 375 | 0  | Sugata, Kenya       |
|                       | Tuto Fela | 2627 | 1975 | 45933 | 342 | 130 | 12 | 117 | 988  | 220 | 0  | Asille Group, Kenya |
|                       | Tuto Fela | 2727 | 2001 | 47932 | 357 | 132 | 9  | 116 | 1033 | 234 | 4  | Asille Group, Kenya |
|                       | Tuto Fela | 2673 | 2112 | 49293 | 406 | 149 | 9  | 124 | 1149 | 260 | 19 | Asille Group, Kenya |
|                       | Tuto Fela | 2656 | 1919 | 44188 | 322 | 129 | 12 | 108 | 966  | 215 | 0  | Asille Group, Kenya |
|                       | Tuto Fela | 2403 | 1810 | 46778 | 393 | 173 | 13 | 148 | 1183 | 263 | 0  | Asille Group, Kenya |
|                       | Tuto Fela | 2575 | 1798 | 38804 | 321 | 145 | 9  | 109 | 1019 | 219 | 0  | Asille Group, Kenya |
|                       | Tuto Fela | 2543 | 1713 | 38030 | 305 | 144 | 9  | 106 | 1020 | 215 | 0  | Asille Group, Kenya |
|                       | Tuto Fela | 2992 | 2333 | 53392 | 401 | 144 | 12 | 124 | 1053 | 234 | 0  | Asille Group, Kenya |
|                       | Tuto Fela | 2825 | 2025 | 47905 | 355 | 139 | 13 | 113 | 1020 | 229 | 0  | Asille Group, Kenya |
|                       | Tuto Fela | 2803 | 2059 | 48937 | 371 | 141 | 9  | 124 | 1031 | 236 | 16 | Asille Group, Kenya |
|                       | Tuto Fela | 2664 | 2097 | 49185 | 385 | 137 | 13 | 125 | 1025 | 223 | 11 | Asille Group, Kenya |
