# Supplementary material
Source: publisher figshare collection journal article supplement (https://brill.figshare.com/articles/dataset/_/16825549)
Supplement: Supplementary file 2 [file 1]

# **New Dates for Megalithic Stele Monuments of Gedeo, South Ethiopia**

*Ashenafi G. Zena* | ORCID: 0000-0001-5387-4703

Department of Archaeology and Historic Preservation, State Historical Society of North  
Dakota, Bismarck, ND 58505, USA

Hawassa University, Sidama Regional State, Ethiopia

*ashuyegirma@yahoo.com*

*Andrew I. Duff* | ORCID: 0000-0001-9531-7024

Department of Anthropology, Washington State University, Pullman, WA 99164-4910,  
USA

*duff@wsu.edu*

*Addisalem Melesse*

Department of Anthropology, Washington State University, Pullman, WA 99164-4910,  
USA

Hawassa University, Sidama Regional State, Ethiopia

*addisalem.sugamo@wsu.edu*

*John A. Wolff*

School of the Environment, Washington State University, Pullman, WA 99164-2812,

USA

*jawolff@wsu.edu*

*Alemseged Beldados* | ORCID: 0000-0003-0730-6080

Addis Ababa University, Addis Ababa, Ethiopia

Department of Archeology and Heritage Management, College of Social Sciences, Addis

Ababa University, P.O. Box 1176, Addis Ababa, Ethiopia

*alemseged.beldados@aau.edu.et*

*M. Steven Shackley* | ORCID: 0000-0002-4122-0427

Geoarchaeological XRF Laboratory, 8100 Wyoming Blvd NE, Ste M4-158,

Albuquerque, NM 87113-1946, USA

*shackley@berkeley.edu*

### **Supplementary material**
